# Supplementary material for: A Fenton-Like Nanocatalyst Based on Easily Separated Magnetic Nanorings for Oxidation and Degradation of Dye Pollutant
Source: PubMed Central journal article supplement (PMC7014477; doi:10.3390/ma13020332), 2020-01-11
Supplement: materials-13-00332-s001.pdf [file materials-13-00332-s001.pdf]

Supporting Information

# A Fenton-Like Nanocatalyst Based on Easily Separated Magnetic Nanorings for Oxidation and Degradation of Dye Pollutant

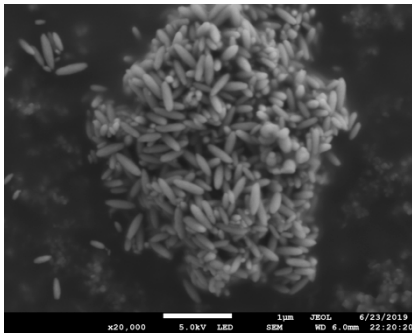

(a)

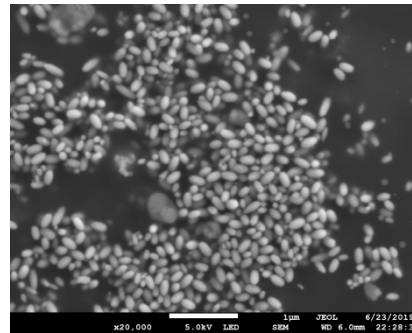

(b)

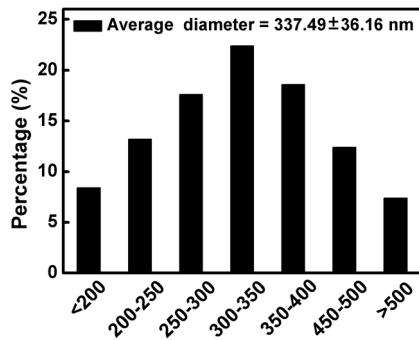

(c)

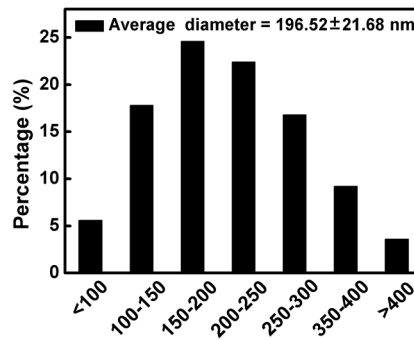

(d)

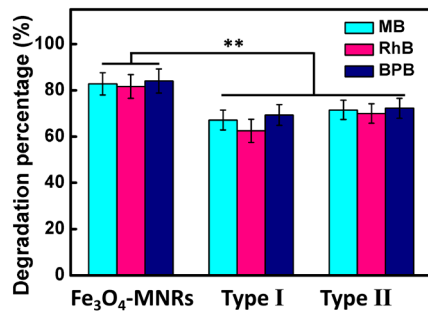

(e)

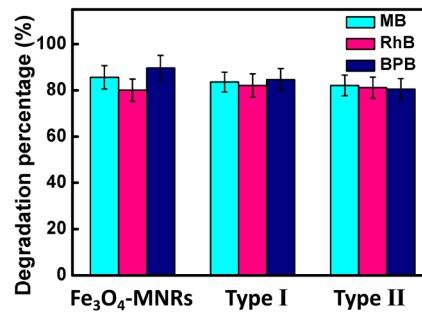

(f)

**Figure S1.** SEM images (a,b) and size distribution (c,d) of the Type I and Type II Fe<sub>3</sub>O<sub>4</sub> nanoparticles. (e) Dyes (MB, RhB and BPB) degradation efficiency by different Fe<sub>3</sub>O<sub>4</sub> nanoparticles (240 min, 20 °C, pH 5.0). (f) Reusability of different Fe<sub>3</sub>O<sub>4</sub> nanoparticles after 10 cycles reuse.

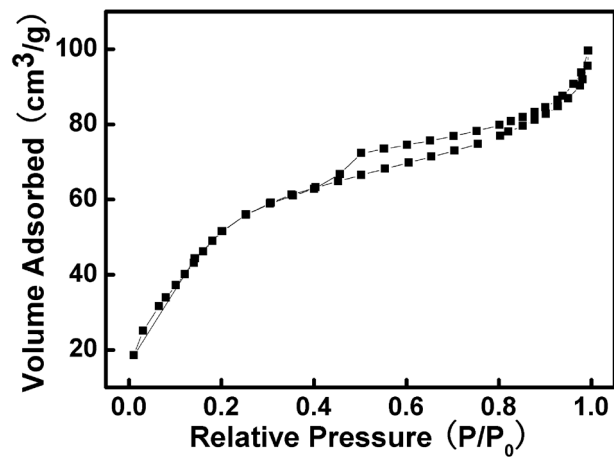

**Figure S2.** N<sub>2</sub> adsorption-desorption isotherms of the as-synthesized Fe<sub>3</sub>O<sub>4</sub>-MNRs.

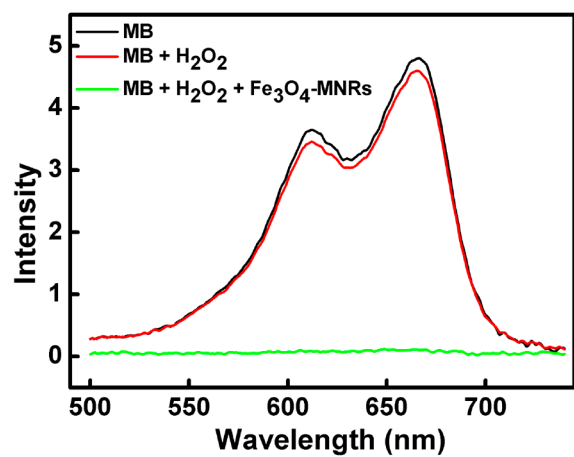

(a)

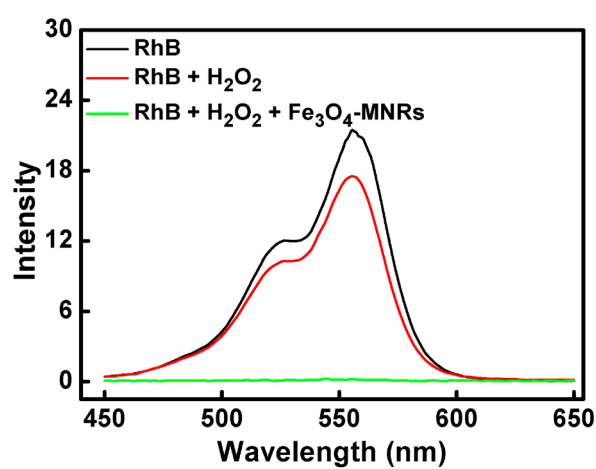

(b)

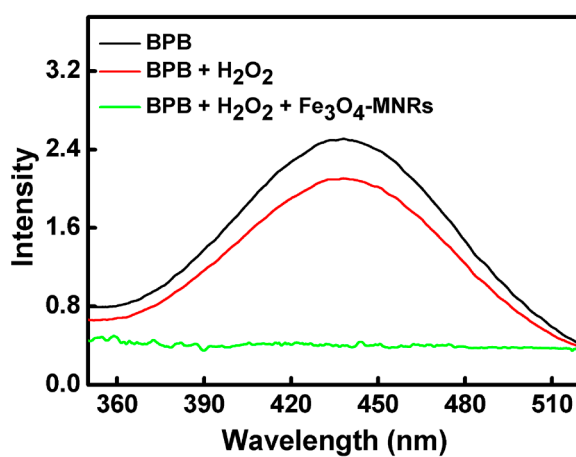

(c)

**Figure S3.** UV-vis curves of MB (a), RhB (b) and BPB (c) solution treated with or without Fe<sub>3</sub>O<sub>4</sub>-MNRs after 2 day treatment.

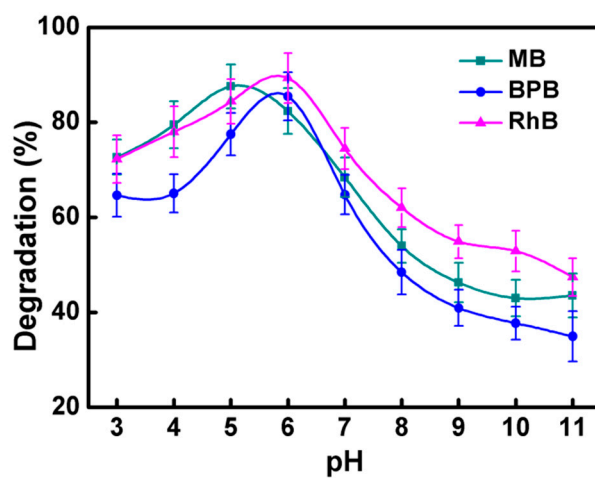

Figure S4. Dyes degradation efficiency of Fe<sub>3</sub>O<sub>4</sub>-MNRs with pH ranges from 3.0 to 11.0.

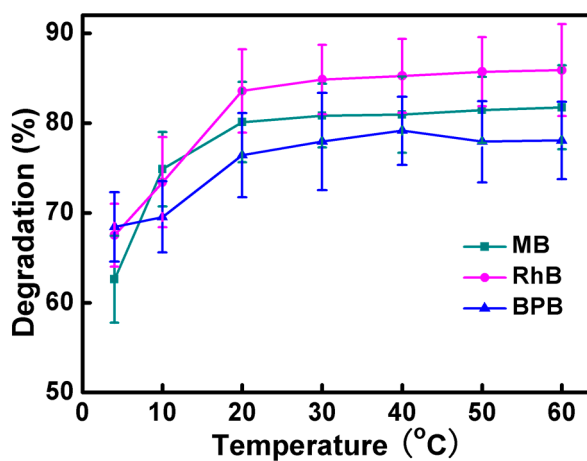

Figure S5. Dyes degradation efficiency of Fe<sub>3</sub>O<sub>4</sub>-MNRs at different temperature.

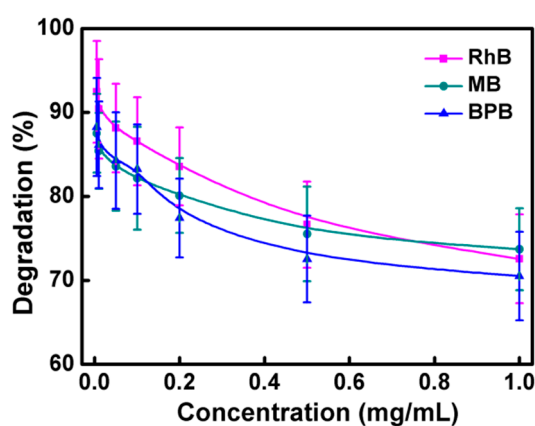

Figure S6. Dyes degradation efficiency of Fe<sub>3</sub>O<sub>4</sub>-MNRs with various initial concentration.

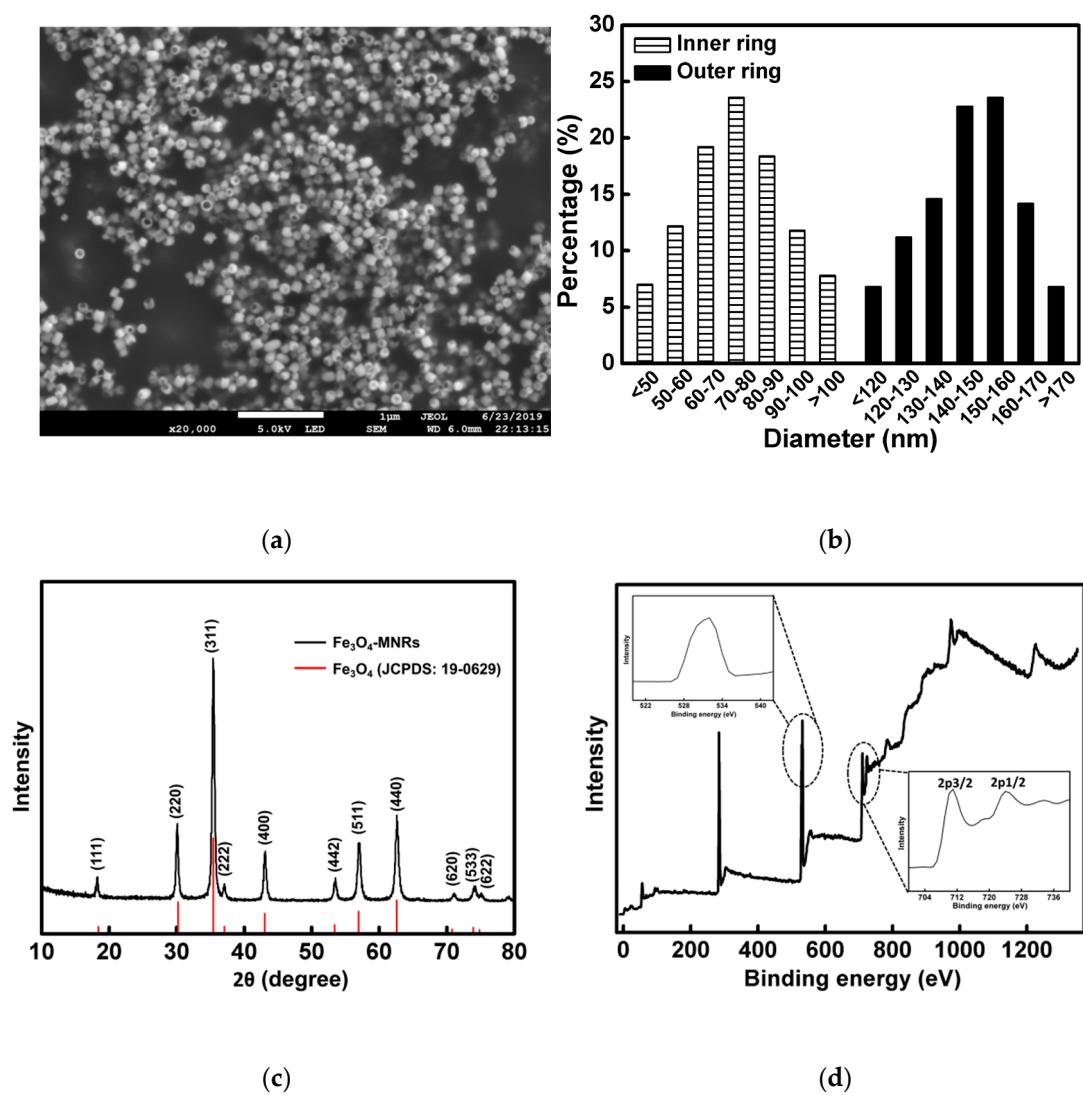

**Figure S7.** SEM image (a), size distribution (b), XRD pattern (c) and XPS spectra (d) of the as-prepared Fe<sub>3</sub>O<sub>4</sub>-MNRs after 10 cycles of use.

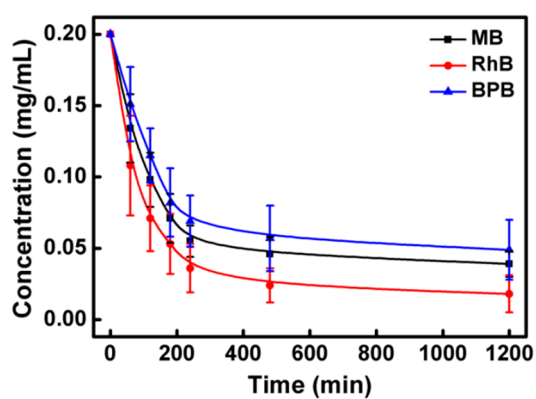

**Figure S8.** Kinetics of the degradation of dyes at three different reaction periods.

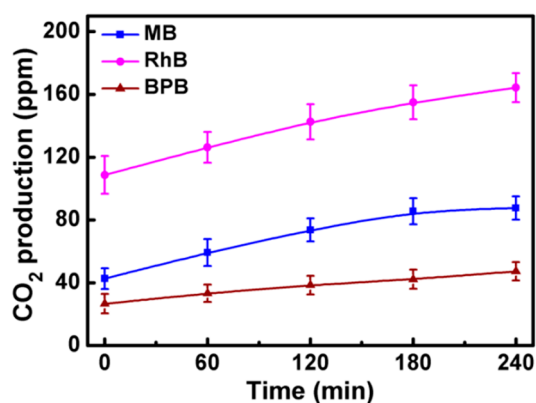

Figure S9. CO<sub>2</sub> production process of different dyes.

Table S1. Calculation of average crystallite size by using Scherrer equation.

| B obs.<br>[2Th] | B std.<br>[2Th] | Pos.<br>[2Th] | Crystallite<br>size(Å) |
|-----------------|-----------------|---------------|------------------------|
| 0.354           | 0.060           | 30.194        | 280                    |
| 0.394           | 0.060           | 35.593        | 250                    |
| 0.315           | 0.060           | 43.170        | 335                    |
| 0.315           | 0.060           | 53.644        | 349                    |
| 0.472           | 0.060           | 57.171        | 219                    |

Table S2. Kinetic parameters for dyes degradation by Fe<sub>3</sub>O<sub>4</sub>-MNRs with different concentration.

| Fe <sub>3</sub> O <sub>4</sub> -<br>MNRs<br>dosage<br>g/L | MB             |                        |                            | BPB            |                        |                            | RhB            |                        |                            |
|-----------------------------------------------------------|----------------|------------------------|----------------------------|----------------|------------------------|----------------------------|----------------|------------------------|----------------------------|
|                                                           | R <sup>2</sup> | q <sub>m</sub><br>mg/g | k <sub>2</sub><br>g/(mg·h) | R <sup>2</sup> | q <sub>m</sub><br>mg/g | k <sub>2</sub><br>g/(mg·h) | R <sup>2</sup> | q <sub>m</sub><br>mg/g | k <sub>2</sub><br>g/(mg·h) |
| 0.1                                                       | 0.990          | 14.46                  | 0.005                      | 0.995          | 12.97                  | 0.004                      | 0.996          | 18.69                  | 0.007                      |
| 0.5                                                       | 0.994          | 12.16                  | 0.032                      | 0.992          | 10.25                  | 0.024                      | 0.998          | 15.26                  | 0.045                      |
| 1.0                                                       | 0.997          | 9.75                   | 0.068                      | 0.999          | 7.69                   | 0.051                      | 0.995          | 11.25                  | 0.076                      |
